## Efficacy and safety of direct oral anticoagulants with diabetes and nonvalvular atrial fibrillation: a systematic review and meta-analysis

G. Costa<sup>1</sup>, L. Goncalves<sup>2</sup>, R. Teixeira<sup>1</sup>

<sup>1</sup>Centro Hospitalar Universitario de Coimbra, Coimbra, Portugal; <sup>2</sup>Coimbra Institute for Clinical and Biomedical Research, Coimbra, Portugal

**Funding Acknowledgement:** Type of funding sources: None.

**Background:** Diabetes Mellitus (DM) is an independent risk factor for stroke and atrial fibrillation (AF). Therefore, the risk/benefit profile of the direct oral anticoagulants (DOAC) is of clinical interest.

**Purpose:** To compare efficacy and safety outcomes of DOAC for nonvalvular AF in patients with DM versus without DM.

**Methods:** We systematically searched PubMed, Embase and Cochrane databases, in January 2020, for interventional studies comparing DOAC efficacy and safety in patients with AF and diabetes versus without diabetes.

**Results:** Four randomized clinical trials were included, providing a total of 63987 patients, 18860 with DM and 45127 without DM. In terms of efficacy, our meta-analysis revealed a similar rate of stroke/systemic embolism (pooled OR 1.02 [0.79, 1.31],  $P=0.87$ ,  $I^2=83%$ ), stroke (pooled OR 1.98 [0.68, 1.40],  $P=0.90$ ,  $I^2=90%$ ) and all-cause mortality (pooled OR 1.18 [0.97, 1.43],  $P=0.10$ ,  $I^2=87%$ ), albeit with a significant heterogeneity.

However, in direct factor Xa inhibitors sub analysis, diabetic patients had a lower trend of systemic embolism/stroke (pooled OR 0.90 [0.79, 1.02],  $P=0.09$ ,  $I^2=18%$ ), significantly lower stroke rate (pooled OR 0.82 [0.73, 0.93],  $P<0.01$ ,  $I^2=0%$ ), but a higher all-cause mortality (pooled OR 1.08 [1.00, 1.16],  $P<0.01$ ,  $I^2=0%$ ). In terms of safety, the diabetic patients receiving DOAC had higher rates of major bleeding events (pooled OR 1.28 [1.14, 1.45],  $P<0.01$ ,  $I^2=50%$ ), although with significant heterogeneity. Direct factor Xa inhibitors sub analysis also revealed a higher rate of major bleeding events (pooled OR 1.22 [1.08, 1.38],  $P<0.01$ ,  $I^2=24%$ ), but a similar intracranial bleeding events (pooled OR 1.03 [0.86, 1.24],  $P=0.72$ ,  $I^2=0%$ ).

**Conclusion:** Our pooled analysis suggests that diabetic patients on DOAC have an higher bleeding risk on DOAC, although with a superior embolic protection.

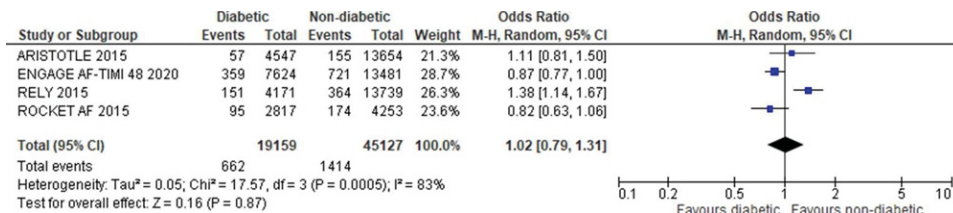

Systemic Embolism/Stroke in DM vs. NonDM

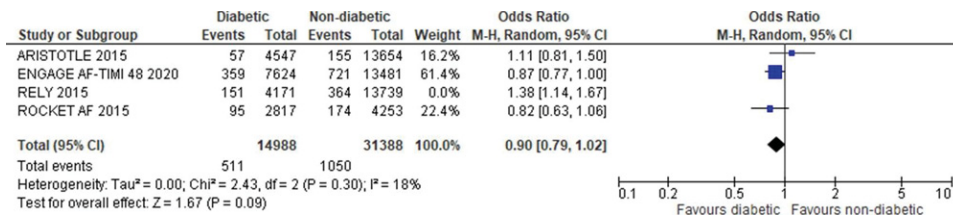

Source: http://academic.oup.com/eurheartj/article-pdf/42/Supplement_1/ehab724.2988/40590064/ehab724.2988.pdf
